# Supplementary material
Source: HighWire-hosted journal article supplement (https://gh.bmj.com/content/5/6/e002605)
Supplement: inline-supplementary-material-1 [file inline-supplementary-material-1.pdf]

## ANNEX 1: Additional Indicators

Additional indicators are based on recommendations in the ANC guideline (WHO 2016a). Table A1.1 lists 22 indicators ready for immediate use. Table A1.2 lists 13 indicators that require attention by the research agenda before they are implemented. Some of the measures currently being used are used solely in research settings and may not be applicable or feasible for routine monitoring and use.

*Table A1.1: Additional indicators for immediate use: Catalogue*

| WHO ANC Model          | Indicator Name                                                                                                             |
|------------------------|----------------------------------------------------------------------------------------------------------------------------|
| Rec. B.1.7             | Measures to ensure all pregnant women are screened and treated for syphilis                                                |
| Good clinical practice | Blood pressure: At least six measures in routine antenatal care (ANC) programme                                            |
| Rec. A.2.1             | Percentage of health facilities routinely providing iron and folic acid                                                    |
| Rec. B.1.7             | Percentage of health facilities routinely providing voluntary counselling and testing for HIV/AIDS                         |
| Rec. C.5               | Percentage of health facilities offering tetanus toxoid vaccination services                                               |
| Rec. C.6               | Percentage of health facilities routinely providing preventative anti-malarial medication                                  |
| Good clinical practice | Percentage of health facilities routinely counselling ANC clients about family planning                                    |
| Rec. A.2.1             | ANC visits where the client received a 3-month supply of iron supplements and a 3-month supply of folate supplements       |
| Rec. B.1.3             | Proportion of women who were asked about physical and sexual violence during a visit to a health unit                      |
| Rec. B.1.5             | Cigarette smoking screened for in pregnancy                                                                                |
| Rec. B.1.7             | Mothers of children 0-23 months who received HIV testing and counselling services during pregnancy (%)                     |
| Rec. B.1.7             | HIV testing in pregnant women                                                                                              |
| Rec. C.1               | Number of episodes where immediate treatment was given per episode of positive urinalysis                                  |
| Rec. C.5               | Percent of women who received at least two doses of tetanus-toxoid vaccine in their last pregnancy                         |
| Rec. C.5               | Number of third trimester ANC visits protected against tetanus (at least TT2) per month                                    |
| Rec. C.5               | Rate of tetanus vaccination                                                                                                |
| Rec. C.6               | Percentage of pregnant women attending ANC who receive a first (and/or second/third) dose of IPTp under direct observation |
| Rec. E.1               | Percent of mothers of children 0-23 months with a maternal health card                                                     |
| Good clinical practice | Blood pressure: At least five measures during pregnancy                                                                    |
| Good clinical practice | ANC visits with blood pressure reading documented                                                                          |

| WHO ANC Model          | Indicator Name                          |
|------------------------|-----------------------------------------|
| Good clinical practice | Blood pressure measured at last exam    |
| Good clinical practice | Exposure to birth preparedness messages |

*Table A1.2: Additional indicators that require further work by the research agenda: Catalogue*

| WHO ANC Model          | Indicator Name                                                                                                |
|------------------------|---------------------------------------------------------------------------------------------------------------|
| Rec. A.2.1             | Preventive treatment with folic acid                                                                          |
| Rec. A.2.1             | IFA supplementation                                                                                           |
| Rec. A.2.1             | Folic acid and iron supplementation in pregnancy                                                              |
| Rec. B.1.5             | Pregnant women assessed for tobacco use and second-hand smoke exposure (%)                                    |
| Rec. B.1.5             | Proportion of pregnant women whose smoking status was checked at the first antenatal visit                    |
| Rec. B.1.5             | Cigarette smoking screened for in pregnancy                                                                   |
| Rec. B.1.7             | Number of pregnant women tested for HIV                                                                       |
| Rec. B.2.1             | Antenatal care: fetal movement enquiry (%)                                                                    |
| Rec. C.5               | Percentage of newborns protected at birth from tetanus (takes into account mother's doses prior to pregnancy) |
| Rec. C.5               | Mothers who received at least two tetanus toxoid vaccinations before the birth of their youngest child (%)    |
| Rec. C.6               | Number of third trimester ANC visits receiving IPT2 (or more) per month                                       |
| Good clinical practice | Receipt of basic ANC services                                                                                 |
| Good clinical practice | Receiving ANC counselling about birth preparedness                                                            |
